# Supplementary material for: Common Features of Environmental Mycobacterium chelonae from Colorado Using Partial and Whole Genomic Sequence Analyses
Source: PubMed Central journal article supplement (PMC10796651; doi:10.1007/s00284-023-03589-2), 2024-01-18
Supplement: 284_2023_3589_MOESM1_ESM.pdf [file 284_2023_3589_MOESM1_ESM.pdf]

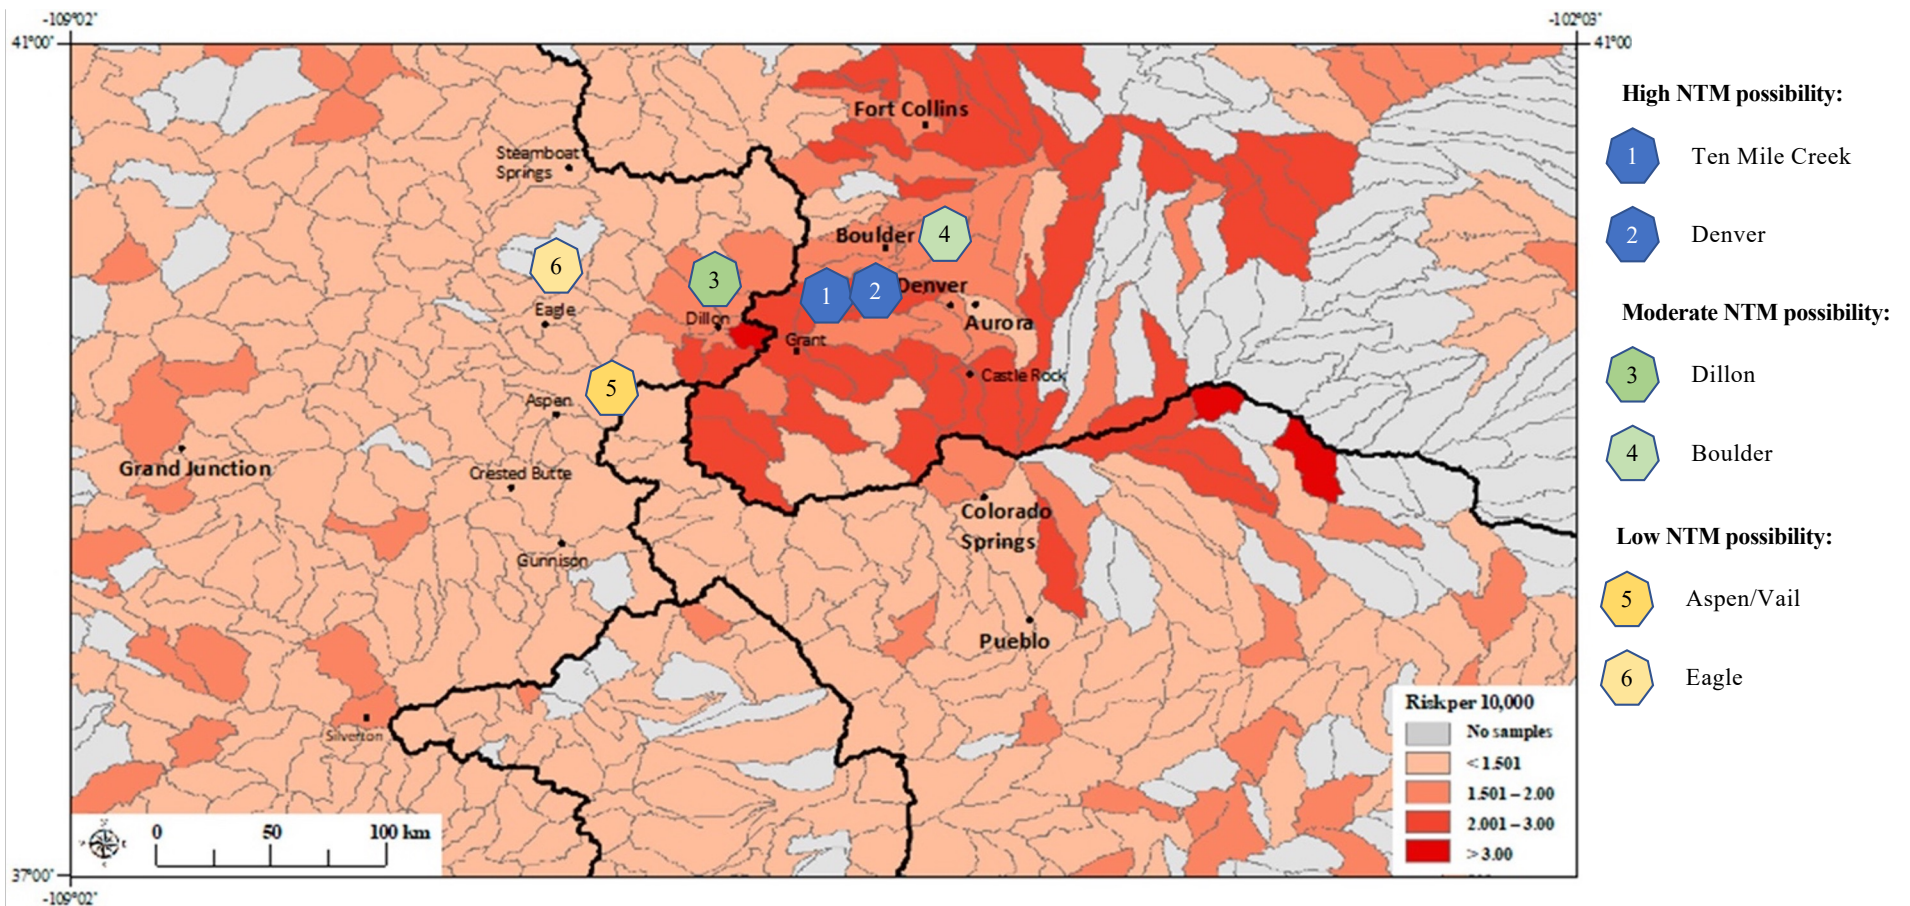

**Online Resource 1.** Fitted NTM lung disease risk estimates per watershed shown in map based on work by Lipner *et al.*, 2020. Shown with permission from co-author Lipner. A total of 54 environmental samples were collected = (3 risk areas) x (2 sites per area) x (3 sampling locations per site) x (3 different types of samples were collected).
